# Supplementary material for: Insulator-to-metal phase transition in a few-layered MoSe2 field effect transistor
Source: Royal Society of Chemistry journal article supplement (doi:10.1039/d2nr05019f), 2023-01-01
Supplement: d2nr05019f1.pdf [file d2nr05019f1.pdf]

## Insulator-to-Metal Phase Transition in a Few-Layered MoSe<sub>2</sub> Field Effect Transistor

Nihar R. Pradhan<sup>1,2,\*</sup>, Carlos Garcia<sup>2</sup>, Bhaswar Chakrabarti<sup>3,4</sup>, Daniel Rosenmann<sup>3</sup>, Ralu Divan<sup>3</sup>, Anirudha V. Sumant<sup>3</sup>, Suzanne Miller<sup>3</sup>, David Hilton<sup>5</sup>, Denis Karaiskaj<sup>6</sup>, and Stephen A. McGill<sup>2\*</sup>

<sup>1</sup>Layered Materials and Device Physics Laboratory,  
Department of Chemistry, Physics and Atmospheric Science,  
Jackson State University, Jackson, MS 39217, USA

<sup>2</sup>National High Magnetic Field Laboratory, Tallahassee, FL 32310, USA

<sup>3</sup>Center for Nanoscale Materials, Argonne National Laboratory, 9700 S-Cass Avenue, Lemont, IL-60439, USA

<sup>4</sup>Department of Electrical Engineering, Indian Institute of Technology Madras, Chennai, Tamil Nadu- 600036, India

<sup>5</sup>Department of Physics, Baylor University, One Bear Place 97316, Waco, TX76798-7316, USA

<sup>6</sup>Department of Physics, University of South Florida, Tampa, FL 33620, USA

(Dated: December 24, 2022)

### I. SUPPLEMENTARY INFORMATION

**Figure S1:** The conductivity data vs temperature in semi-logarithmic scale is plotted in Figure 1. This is the same data shown in the main body in Fig. 3(a). This semi-logarithmic plot clearly shows the insulating behavior of the MoSe<sub>2</sub> at low applied gate voltage,  $V_{bg}$ , where the conductivity decreases with decreasing temperature. When the gate voltage increased the slope of the conductivity changed, and above a certain threshold of applied voltage (marking a critical density of charge carriers induced by the applied gate voltage) the slope of the conductivity data changed sign compared to the insulating phase conductivity.

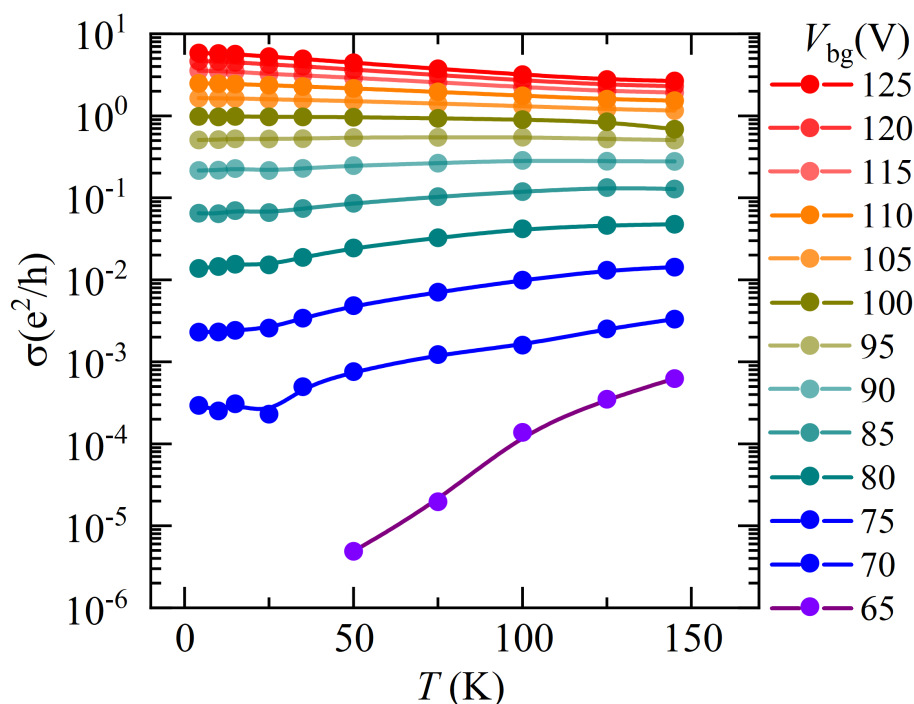

FIG. S1: Conductivity measured using 4-terminal method plotted as function of temperature in semi-logarithmic scale. The sample became too resistive to measure below 50 K for  $V_{bg} = 65$  V

\*Electronic address: Corresponding\_Email:nihar.r.pradhan@jsums.edu;Email:mcgill@magnet.fsu.edu

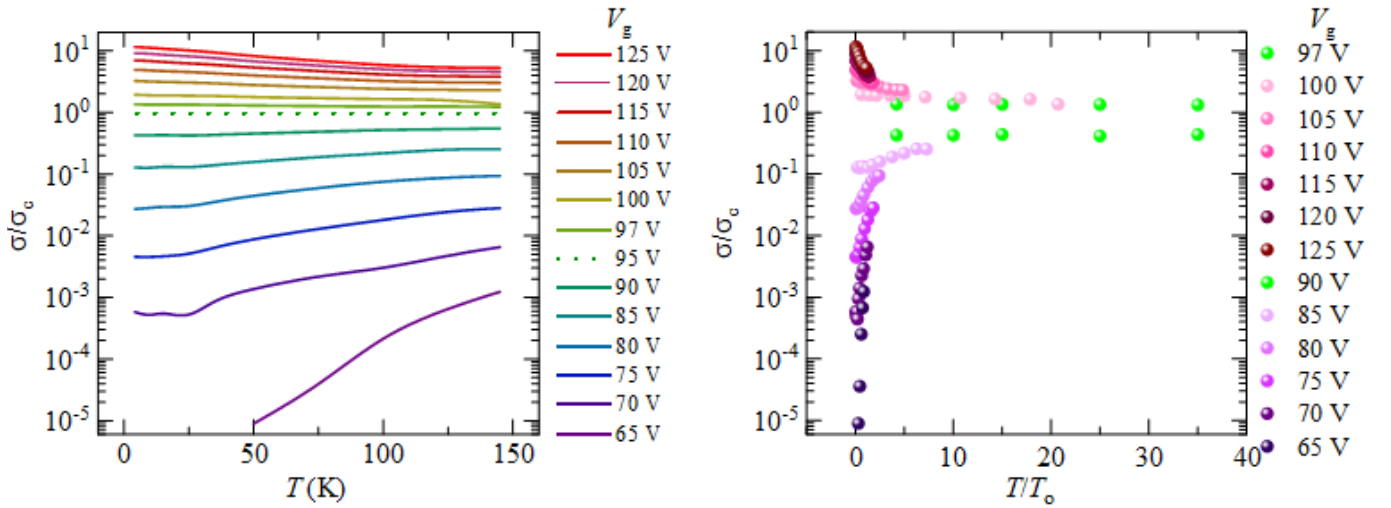

FIG. S2: (left) Conductivity,  $\sigma$ , curves normalized by the critical conductivity  $\sigma_c(T, V_{bg} = 95 \text{ V})$ , depicted by the dashed line) at the critical carrier density  $n_c = n(V_{bg} = 95 \text{ V})$  as functions of the temperature  $T$ . (right) Plotting the rescaled conductivity,  $\sigma/\sigma_c$  as a function of the rescaled temperature,  $T/T_0$ , showed no collapse of the conductivity curves to a single line that would indicate a quantum-critical aspect of the phase transition.

**Figure S2:** We plotted the temperature-dependent conductivity,  $\sigma$ , by normalizing all the curves with the critical conductivity value,  $\sigma_c$ , shown in Fig. 2 (left). Critical conductivity  $\sigma_c$  is represented by a dashed line which separates the insulating branch of the conductivity (below  $\sigma_c$ ) and the metallic branch of the conductivity (above  $\sigma_c$ ). In a quantum phase transition (QPT), the material undergoes a phase transition at  $T=0 \text{ K}$ . The QPT occurs at the quantum critical point, which is where quantum fluctuations drive the transition to diverge and become scale-invariant in space and time. Experimentally, the two branches of the conductivity should scale with a temperature parameter,  $T_o$ , in such a way that

$$T_o \propto \delta n^{z\nu} \quad (1)$$

where  $\delta n = (\frac{n-n_c}{n_c})$ .  $z$  and  $\nu$  are the dynamic and correlation exponents, respectively. This suggests that the two branches of the conductivity should collapse into a single curve with appropriate  $T_o$  values. As demonstrated from the fitting of Fig. 2 (right), we have not established any collapse of the conductivity curves on either branch, which indicated that our phase transition did not exhibit quantum criticality.
